# Supplementary material for: Incremental Prognostic Utility of Left Ventricular Global Longitudinal Strain in Hypertrophic Obstructive Cardiomyopathy Patients and Preserved Left Ventricular Ejection Fraction
Source: PubMed Central journal article supplement — J Am Heart Assoc. 2017 Oct 20;6(10):e006514. doi: 10.1161/JAHA.117.006514 (PMC5721859; doi:10.1161/jaha.117.006514), 2017-10-20
Supplement: JAH3-6-e006514-s001.pdf [file JAH3-6-e006514-s001.pdf]

# **Supplemental Material**

## **Data S1.**

The relevant baseline and follow-up characteristics of the study population, separated on basis of surgery (vs. not) are shown in Table S1 below.

During this longer-term follow-up, 166 (16%) had evidence of AF and were treated with medications (144 with amiodarone, 6 with dofetilide, 16 with rate control). Nonsustained and sustained VT were noted in 109 (11%) and 4 (1%) patients, respectively. Also, during follow up, there were 42 (4%) patients with permanent pacemakers and 122 (20%) patients with ICD's, respectively. Within the surgical group (n=668), the type of cardiac surgeries was as follows: isolated myectomy (n=541, 81%) and myectomy plus mitral surgery (n=127, 19%). In the subgroup with concomitant mitral surgery, only 20 (16%) underwent valve replacement; the rest underwent transaortic repair. During follow-up, 20 (3%) patients needed a repeat surgical procedure to relieve LVOT obstruction (85% of which requiring an additional mitral valve procedure). The median time from initial evaluation to surgery was 36 days (interquartile range 1, 129 days). Of the surgical group, 554 (83%) patients underwent surgery following an initial evaluation (due to intractable symptoms or poor exercise tolerance), while 114 (17%) patients developed progressive CHF symptoms during follow-up that required surgery. In the nonsurgical group, 63% patients were in NYHA class I at initial presentation and remained asymptomatic during follow-up. The remaining patients were not offered surgery as the symptoms were deemed adequately controlled with medical therapy.

**Table S1.** Relevant baseline and imaging characteristics of study sample, separated on basis of surgery vs. not (n=1019)

| Variable                                                                     | No surgery<br>N=351 | Surgery<br>N=668 | p-value |
|------------------------------------------------------------------------------|---------------------|------------------|---------|
| <i>Baseline data</i>                                                         |                     |                  |         |
| Age                                                                          | 50±13               | 50±14            | 0.44    |
| Male sex                                                                     | 227 (65%)           | 413 (62%)        | 0.21    |
| Family history of hypertrophic cardiomyopathy                                | 53 (15%)            | 119 (18%)        | 0.15    |
| History of sudden death                                                      | 2 (1%)              | 4 (1.6%)         | 0.66    |
| Unexplained syncope                                                          | 32 (9%)             | 114 (17%)        | 0.01    |
| Beta-blockers                                                                | 226 (64%)           | 520 (78%)        | <0.001  |
| Calcium channel blocker                                                      | 96 (24%)            | 220 (33%)        | 0.04    |
| Disopyramide                                                                 | 7 (2%)              | 35 (5%)          | <0.001  |
| Angina                                                                       | 32 (9%)             | 111 (16%)        | <0.01   |
| New York Heart Association Class                                             |                     |                  |         |
| I                                                                            | 204 (58%)           | 92 (14%)         | <0.001  |
| II                                                                           | 147 (42%)           | 379 (57%)        |         |
| III/IV                                                                       | 0                   | 197 (29%)        |         |
| Major risk factors                                                           |                     |                  |         |
| None                                                                         | 269 (77%)           | 497 (74%)        | 0.79    |
| 1                                                                            | 75 (21%)            | 150 (23%)        |         |
| 2 or more                                                                    | 7 (2%)              | 21 (3%)          |         |
| European risk score                                                          | 3.79±.9             | 4.24±0.7         | 0.02    |
| Left ventricular ejection fraction (%)                                       | 62±5                | 62±4             | 0.31    |
| Maximal left ventricular thickness (cm)                                      | 2.01±0.5            | 2.0±0.4          | 0.34    |
| Indexed left atrial dimensions (cm/m <sup>2</sup> )                          | 2.2±0.4             | 2.3±0.4          | 0.1     |
| Resting mitral regurgitation > II+                                           | 11 (3%)             | 84 (13%)         | <0.001  |
| Maximal left ventricular outflow tract gradient (mm Hg)                      | 74±35               | 103±39           | <0.001  |
| Left ventricular global longitudinal strain                                  | -13.7%              | -13.6%           | 0.15    |
| Peak oxygen consumption (ml/kg/min on metabolic stress*)                     | 25±7                | 19±5             | <0.001  |
| Abnormal blood pressure response to exercise*                                | 0                   | 8 (1%)*          | <0.01   |
| <i>Follow up data</i>                                                        |                     |                  |         |
| Atrial fibrillation during follow up (excluding within 30-day postoperative) | 39 (11%)            | 127 (19%)        | <0.01   |
| Nonsustained ventricular tachycardia                                         | 38 (11%)            | 71 (11%)         | 0.52    |
| Pacemaker                                                                    | 9 (3%)              | 33 (5%)          | 0.04    |
| Internal cardioverter defibrillator                                          | 37 (11%)            | 85 (13%)         | 0.18    |

Categorical variables are presented as n (%), continuous variables are presented as mean±standard deviation

\*The percentages was derived only from those patients that underwent metabolic stress echocardiography (n=627).

The results of multivariable Cox Proportional Hazard analysis of the study population for the secondary composite endpoint of all cause death and appropriate ICD discharge are shown in supplemental tables 2 and 3 below (total n=1019, number of events n=79)

**Tables S2 and S3.** Multivariable Cox Proportional Hazard Analysis of the study population for the secondary composite endpoint of all-cause mortality and appropriate ICD discharge (total n=1019, number of events n=79)

| <b>Table S2. Model 1 (with standard major risk factors included in analysis)</b>                                                                                      |                     |                |
|-----------------------------------------------------------------------------------------------------------------------------------------------------------------------|---------------------|----------------|
|                                                                                                                                                                       | <b>Hazard ratio</b> | <b>p-value</b> |
| <b>Age</b>                                                                                                                                                            | 1.05 [1.02-1.07]    | <0.001         |
| <b>Atrial fibrillation during follow-up</b>                                                                                                                           | 1.39 [1.12-1.79]    | <0.001         |
| <b>LV-GLS (for every % worsening)</b>                                                                                                                                 | 1.10 [1.03-1.24]    | <0.001         |
| <b>Surgical myectomy</b>                                                                                                                                              | 0.49 [0.18-0.73]    | <0.01          |
| Following potential additional predictors were considered for analysis but were not significant: standard major risk factors, sex, maximal LVOT gradient, medications |                     |                |
| <b>Table S3. Model 2 (with ESC risk score included in analysis)</b>                                                                                                   |                     |                |
|                                                                                                                                                                       | <b>Hazard ratio</b> | <b>p-value</b> |
| <b>Atrial fibrillation during follow-up</b>                                                                                                                           | 1.45 [1.13-2.14]    | <0.001         |
| <b>LV-GLS (for every % worsening)</b>                                                                                                                                 | 1.09 [1.05-1.19]    | <0.001         |
| <b>Surgical myectomy</b>                                                                                                                                              | 0.47 [0.21-0.71]    | <0.01          |
| Following potential additional predictors were considered for analysis; but were not significant: ESC risk score, sex, medications                                    |                     |                |
